# Supplementary material for: Sulfide electrolyte additive enables multi-ionic transfer pathways in alkaline iron redox
Source: Royal Society of Chemistry journal article supplement (doi:10.1039/d5ta08086j), 2025-12-22
Supplement: d5ta08086j1.pdf [file d5ta08086j1.pdf]

**Supporting Information for**

# **Sulfide Electrolyte Additive Enables Multi-Ionic Transfer Pathways in the Alkaline Iron Redox**

Divakar Arumugam,<sup>a</sup> AM Milinda Abeykoon,<sup>b</sup> Gihan Kwon,<sup>b</sup> Cheng-Hung Lin,<sup>b</sup> Lihua Zhang,<sup>c</sup>  
and Xiaowei Teng<sup>\*a</sup>

<sup>a</sup> Department of Chemical Engineering, Worcester Polytechnic Institute, Worcester, Massachusetts 01609, United States

<sup>b</sup> National Synchrotron Light Source II, Brookhaven National Laboratory, Upton, New York 11973, United States

<sup>c</sup> Center for Functional Nanomaterials, Brookhaven National Laboratory, Upton, New York 11973, United States

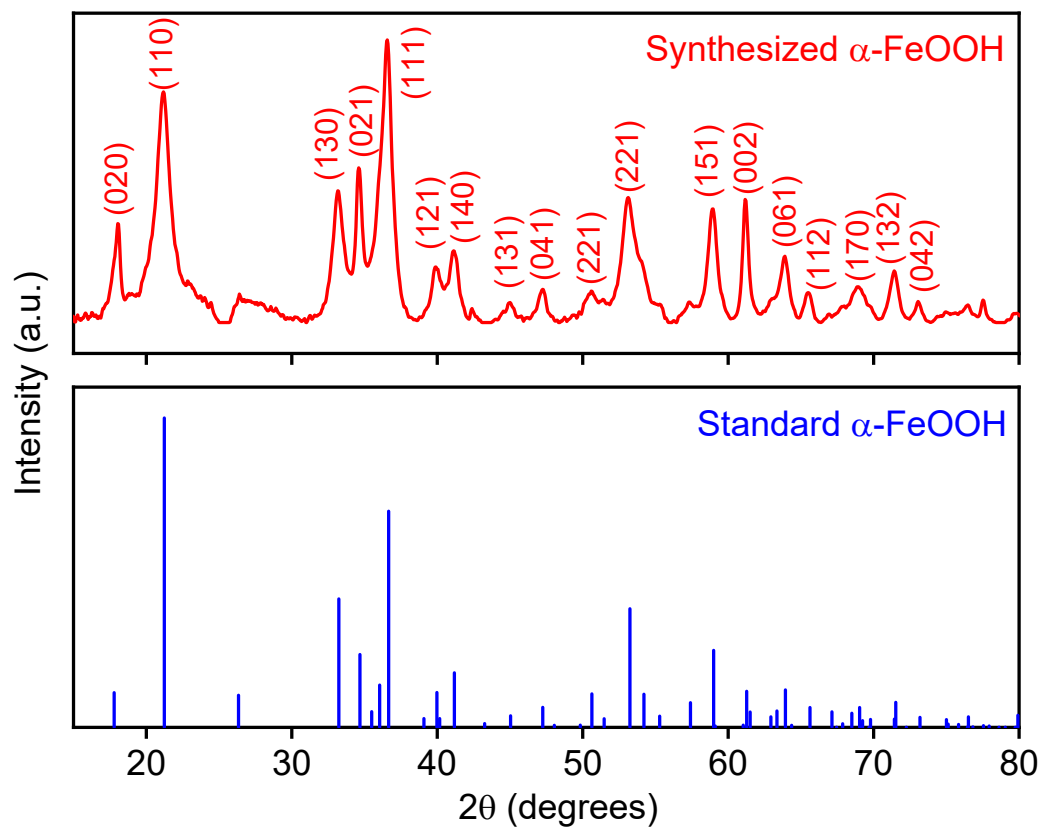

**Figure S1. Structural characterization of as-made iron oxide.** XRD analysis of as-made iron oxide shows a pure phase of  $\alpha$ -FeOOH.

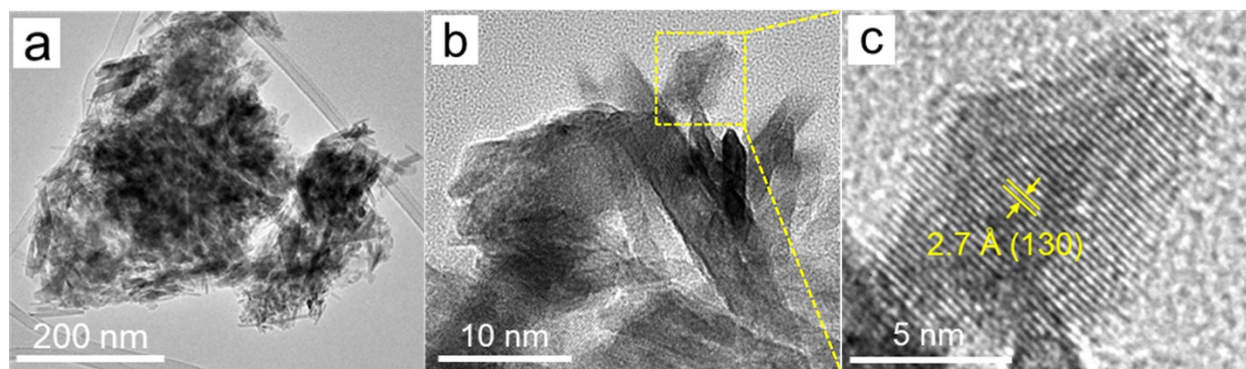

**Figure S2. TEM characterization of as-made  $\alpha$ -FeOOH.** (a) Low-mag and (b, c) high-mag images of  $\alpha$ -FeOOH materials.

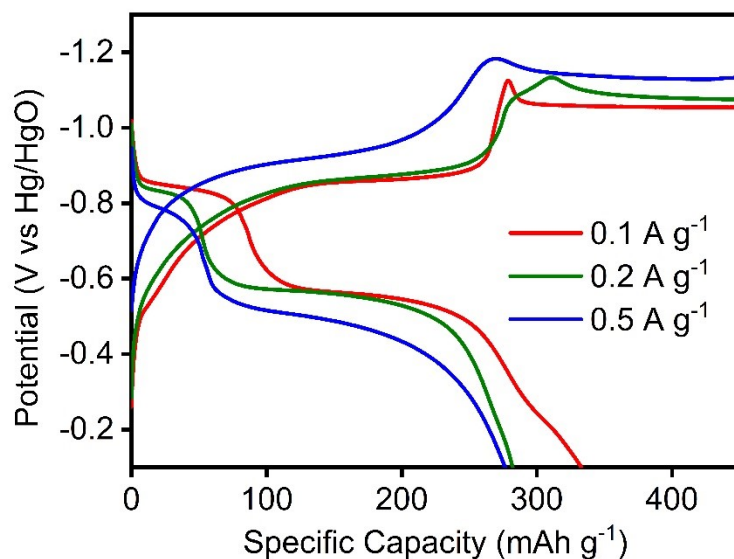

**Figure S3. Effect of current density on Fe redox assessed by CP measurements.** Discharge capacity of  $\text{Fe}^{2+}/\text{Fe}^{3+}$  redox in  $\text{NaOH}/\text{Na}_2\text{SiO}_3/\text{Na}_2\text{S}$  electrolytes increases from 276, 281, to 330  $\text{mAh g}^{-1}$  as the current densities decrease from 0.5, 0.2 to 0.1  $\text{A g}^{-1}$ .

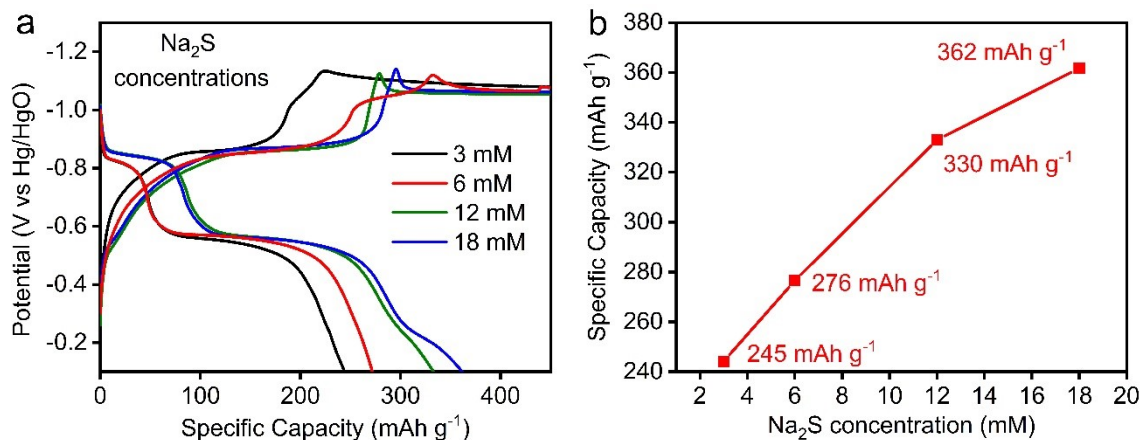

**Figure S4. Effect of  $\text{Na}_2\text{S}$  additive on Fe redox assessed by CP measurements.** Discharge capacity of  $\text{Fe}^{2+}/\text{Fe}^{3+}$  redox increases proportionally with  $\text{Na}_2\text{S}$  concentration in the low-concentration range, where additional increases in  $\text{Na}_2\text{S}$  have less significant contribution.

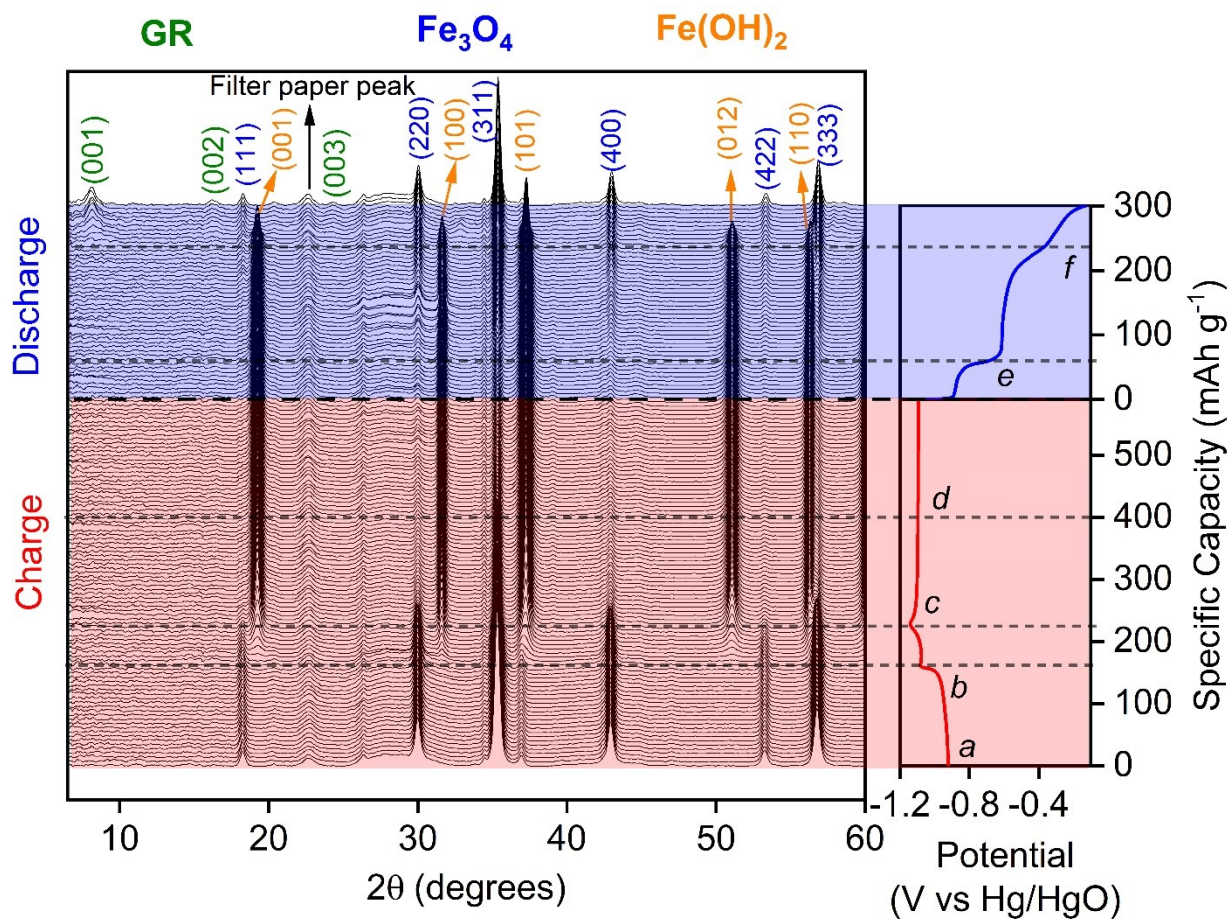

**Figure S5.** Stacked waterfall plots of *operando* XRD patterns acquired simultaneously with CP measurements at  $0.1 \text{ A g}^{-1}$  in  $\text{NaOH}/\text{Na}_2\text{SiO}_3/\text{Na}_2\text{S}$  electrolyte.

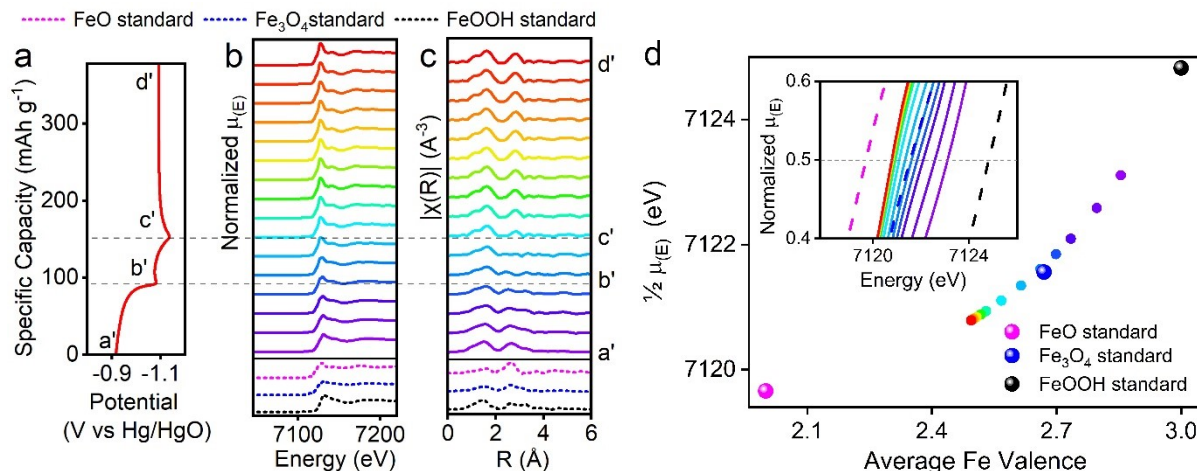

**Figure S6.** Operando XAS measurements in NaOH/Na<sub>2</sub>SiO<sub>3</sub>/Na<sub>2</sub>S electrolyte. (a) CP measurement conducted at 0.2 A g<sup>-1</sup>, waterfall plots of (b) Fe-K edge XAS spectra in energy-space (c) FT of XAS spectra in R-space and (d) Fe valence evolution compared with reference iron samples with defined valences. Zoom-in XAS spectra at 1/2  $\mu(E)$  are shown in the inset.

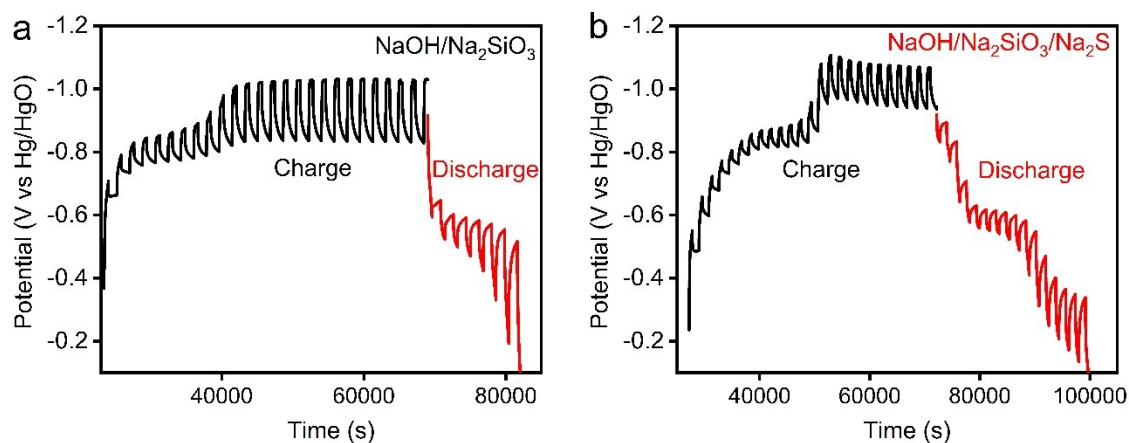

**Figure S7.** GITT tests conducted at 0.1 A g<sup>-1</sup> in (a) NaOH/Na<sub>2</sub>SiO<sub>3</sub> and (b) NaOH/Na<sub>2</sub>SiO<sub>3</sub>/Na<sub>2</sub>S electrolytes.
